# Supplementary material for: DNA-templated Au nanoclusters coupled with proximity-dependent hybridization and guanine-rich DNA induced quenching: a sensitive fluorescent biosensing platform for DNA detection
Source: Royal Society of Chemistry journal article supplement (doi:10.1039/c8na00278a), 2019-01-01
Supplement: c8na00278a1.pdf [file c8na00278a1.pdf]

**Electronic Supplementary Information (ESI)**  
**for**  
**DNA-templated Au nanoclusters coupling with**  
**proximity-dependent hybridization and guanine-rich DNA**  
**induced quenching: sensitive fluorescent biosensing platform**  
**for DNA detection**

Hai-Bo Wang\*, Hong-Yu Bai, Gao-Li Dong, Yan-Ming Liu

*College of Chemistry and Chemical Engineering, Institute for Conservation and Utilization of Agro-bioresources in Dabie Mountains, Xinyang Normal University, Xinyang 464000, PR China*

\* Corresponding author. E-mail address: wanghaibohn@163.com (H.-B. Wang).

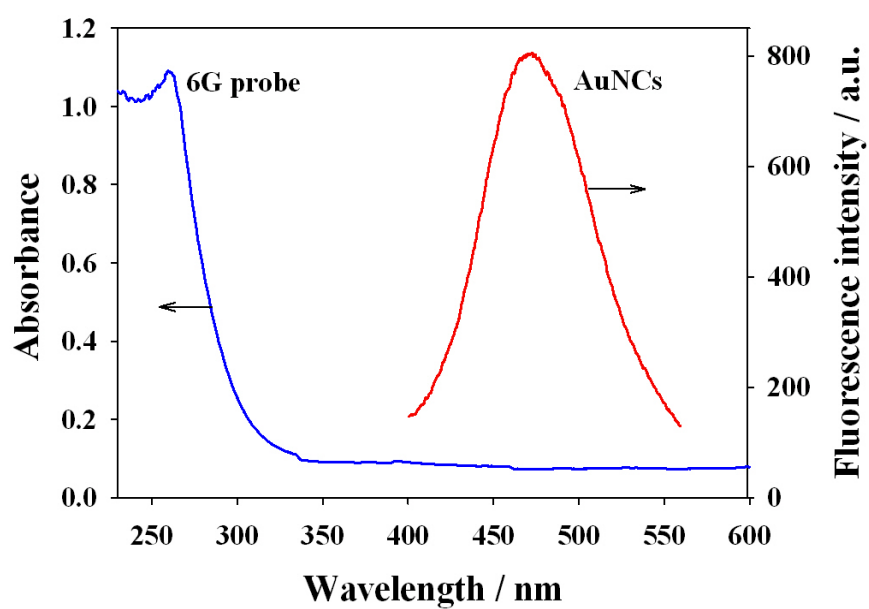

**Fig. S1** UV-Vis absorption spectra of 6G probe and fluorescence emission spectra of P1 DNA-AuNCs.

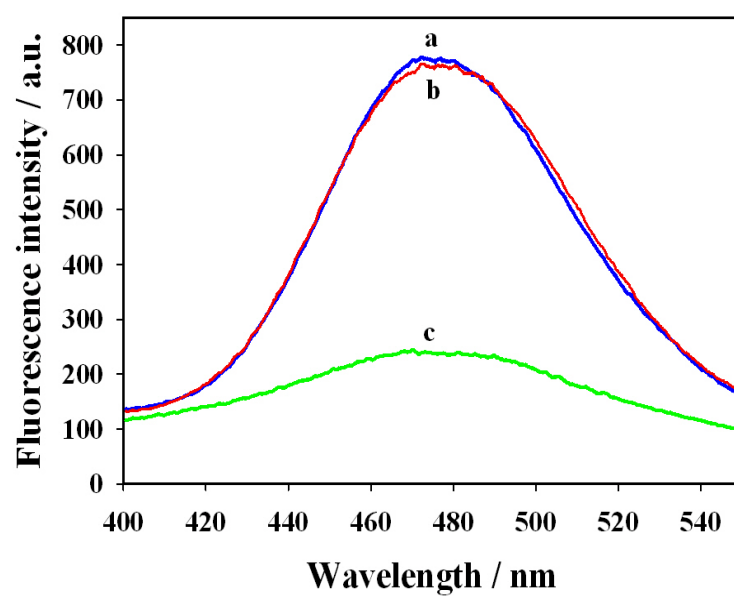

**Fig. S2** Fluorescence emission spectra of P2 DNA-AuNCs (a), P2 DNA-AuNCs + 6G probe 2 (b), P2 DNA-AuNCs + 6G probe 2 + target DNA H1N1 (c).
